# Supplementary material for: The Synthesis and Evaluation of Porous Carbon Material from Corozo Fruit (Bactris guineensis) for Efficient Propranolol Hydrochloride Adsorption
Source: MDPI journal article supplement (doi:10.3390/molecules28135232), 2023-07-05
Supplement: s1 [file s1]

# Supplementary Materials

Dison Stracke Pfingsten Franco <sup>1,\*</sup>, Jordana Georgin <sup>1,2,\*</sup>, Claudete Gindri Ramos <sup>1</sup>, Salma Martinez Eljaiek <sup>1</sup>, Daniel Romero Badillo <sup>1</sup>, Anelise Hoch Paschoalin de Oliveira <sup>3</sup>, Daniel Allasia <sup>2</sup> and Lucas Meili <sup>4</sup>

<sup>1</sup> Department of Civil and Environmental, Universidad de la Costa, CUC, Calle 58# 55-66, Barranquilla, Atlántico 080002, Colombia

<sup>2</sup> Graduate Program in Environmental Engineering, Federal University of Santa Maria, Santa Maria 97105-900, RS, Brazil

<sup>3</sup> Graduate Program in Chemical Engineering, Federal University of Santa Maria, Santa Maria 97105-900, RS, Brazil

<sup>4</sup> Process Laboratory, Technology Center, Federal University of Alagoas 57072-870, Maceió, AL, Brazil

\* Correspondence: francodison@gmail.com (D.S.P.F.); jordanageorgin89@gmail.com (J.G.)

## S.1 Batch adsorption equations

The adsorption capacity at any time ( $q_t$ , mg g<sup>-1</sup>), adsorption capacity at the equilibrium ( $q_e$ , mg g<sup>-1</sup>), and removal percentage ( $R$ , %) values were calculated by the Equations (S2), (S3) and (S4), respectively:

$$q_t = (C_0 - C_t) \frac{V}{m} \quad (S1)$$

$$q_e = (C_0 - C_e) \frac{V}{m} \quad (S2)$$

$$R = \frac{(C_0 - C_t)}{C_0} 100 \quad (S3)$$

Where:  $C_0$  is the initial adsorbate concentration in the liquid phase (mg L<sup>-1</sup>),  $C_e$  is the equilibrium concentration of the adsorbate in the liquid phase (mg L<sup>-1</sup>),  $C_t$  is the adsorbate concentration in the liquid phase at any time (mg L<sup>-1</sup>),  $m$  is the mass of adsorbent (g), and  $V$  is the volume of solution (L).

## S.2 Isotherm models

The Langmuir model (Equation (4)), Freundlich model (Equation (S5)), and Koble-Corrigan model (Equation (S7)) are presented as follows:

$$q_e = q_L \frac{K_L C_e}{1 + K_L C_e} \quad (S4)$$

$$q_e = K_F C_e^{1/n_f} \quad (S5)$$

$$q_e = \frac{K_{RP} C_e}{1 + a_{RP} C_e^{n_{RP}}} \quad (S6)$$

$$q_e = \frac{A_{KC} (C_e)^{n_{KC}}}{1 + K_{KC} (C_e)^{n_{KC}}} \quad (S7)$$

$$q_{KC} = \frac{A_{KC}}{K_{KC}} \quad (S8)$$

Where:  $q_L$  is the maximum adsorption capacity of Langmuir model ( $\text{mg g}^{-1}$ ),  $K_L$  is the Langmuir constant ( $\text{L mg}^{-1}$ );  $K_F$  is the Freundlich constant ( $(\text{mg g}^{-1}) (\text{mg L}^{-1})^{-1/n}$ );  $1/n_f$  (dimensionless) is the heterogeneity factor;  $K_{RP}$  is the Redlich-Peterson constant ( $\text{L mg}^{-1}$ ),  $a_{RP}$  is the affinity coefficient ( $\text{L mg}^{-1}$ )<sup>n<sub>RP</sub></sup>,  $n_{RP}$  is the Redlich-Peterson exponent;  $A_{KC}$  is the Koble-Corrigan constant ( $(\text{mg g}^{-1})(\text{L mg}^{-1})^{n_{KC}}$ ),  $K_{KC}$  is the Koble-Corrigan equilibrium constant ( $(\text{L mg}^{-1})^{n_{KC}}$ ),  $n_{KC}$  is the Koble-Corrigan exponent (dimensionless),  $q_{KC}$  is the Koble-Corrigan adsorption equilibrium ( $\text{mg g}^{-1}$ ).

### S.3 Thermodynamic estimation

The Gibbs free energy ( $\Delta G^0$ ,  $\text{kJ mol}^{-1}$ ), enthalpy change ( $\Delta H^0$ ,  $\text{kJ mol}^{-1}$ ), and entropy change ( $\Delta S^0$ ,  $\text{kJ mol}^{-1} \text{K}^{-1}$ ) were calculated by the following Equations:

$$K_e = \frac{K_L M_W \gamma^{PROP}}{\Gamma} \quad (S9)$$

$$\Delta G^0 = -RT \ln(K_e) \quad (S10)$$

$$\Delta G^0 = \Delta H^0 - T \Delta S^0 \quad (S11)$$

$$\ln(K_e) = \frac{\Delta S^0}{R} - \frac{\Delta H^0}{RT} \quad (S12)$$

where:  $K_e$  is the equilibrium constant (dimensionless),  $\gamma^{PROP}$  is the activity coefficient of the drug in solution (dimensionless, assuming  $\gamma^{PROP} = 1$ );  $\Gamma$  is the unitary activity coefficient of  $1 \text{ mol L}^{-1}$ ;  $T$  is the temperature (K);  $R$  is the universal gas constant ( $8.31 \times 10^{-3} \text{ kJ mol}^{-1} \text{K}^{-1}$ ).

### S.4 Kinetic models

For describing the kinetics of adsorption the following models were adjusted to the experimental data: Pseudo-first order, Pseudo-second order, General order, Elovich, and Avrami

$$q_t = q_1 (1 - e^{-k_1 t}) \quad (S13)$$

$$q_t = \frac{t}{\left(\frac{1}{k_2 q_2^2}\right) + \left(\frac{t}{q_2}\right)} \quad (S14)$$

$$q_t = \left( q_e - \frac{q_n}{\left[ k_N \cdot (q_n)^{n-1} \cdot t \cdot (n-1) + 1 \right]^{1/(1-n)}} \right) \quad (S16)$$

Where  $k_1$  ( $\text{min}^{-1}$ ),  $k_2$  ( $\text{g mg}^{-1} \text{min}^{-1}$ ), and  $k_N$  [ $(\text{min}^{-1})(\text{g mg}^{-1})^{n-1}$ ] are the kinetics constants of pseudo-first-order, pseudo-second-order, and general order models, respectively;  $q_1$ ,  $q_2$ , and  $q_n$  are the theoretical values for the adsorption capacity at the equilibrium for each

model ( $\text{mg g}^{-1}$ );  $n$  is the general order of General Kinetic model (dimensionless),  $t$  is contact time (min).

The linear driving force model (LDF) was also selected, where the adsorption rate can be expressed as:

$$\frac{d\bar{q}}{dt} = k_{\text{LDF}} \left( q_L \frac{K_L C_0 - D_0 \bar{q}}{1 + K_L C_0 - D_0 \bar{q}} - \bar{q} \right) \quad (\text{S17})$$

Furthermore, the diffusivity for a homogeneous particle can be estimated from the LDF kinetic lumped parameter:

$$D_s = \frac{R_p^2 k_{\text{LDF}}}{15} \quad (\text{S18})$$

$R_p$  is the adsorbent particle radius, and  $D_s$  is the surface diffusivity ( $\text{cm}^2 \text{s}^{-1}$ ).

### S.5 Statistical evaluation

The determination coefficient ( $R^2$ ) (Equation (S18)), adjusted determination coefficient ( $R^2_{\text{adj}}$ ) (Equation (S19)), average relative error (ARE) (Equation (S20)), and mean square error (MSR) (Equation (S21)), Bayesian indicator criterion (BIC) are given by the following Equations:

$$R^2 = 1 - \frac{\sum_{i=1}^n (y_{\text{exp}} - y_{\text{pred}})^2}{\sum_{i=1}^n (y_{\text{exp}} - \bar{y}_{\text{exp}})^2} \quad (\text{S19})$$

$$R^2_{\text{adj}} = 1 - (1 - R^2) \frac{(n-1)}{(n-p-1)} \quad (\text{S20})$$

$$\text{ARE} = \frac{100\%}{n} \sum_{i=1}^n \left| \frac{y_{\text{exp}} - y_{\text{pred}}}{y_{\text{exp}}} \right| \quad (\text{S21})$$

$$\text{MSR} = \frac{1}{n-p} \sum_{i=1}^n (y_{\text{exp}} - y_{\text{pred}})^2 \quad (\text{S22})$$

$$\text{BIC} = n \ln \left( \frac{\text{RSS}}{n} \right) + p \ln(n) \quad (\text{S23})$$

where:  $y_{\text{exp}}$  is the experimental value;  $y_{\text{pred}}$  is the predicted value;  $n$  is the number of experimental values;  $p$  is the number of parameters according to the model.

## S.6 Figures

This section presents all the Figures called in the manuscript.

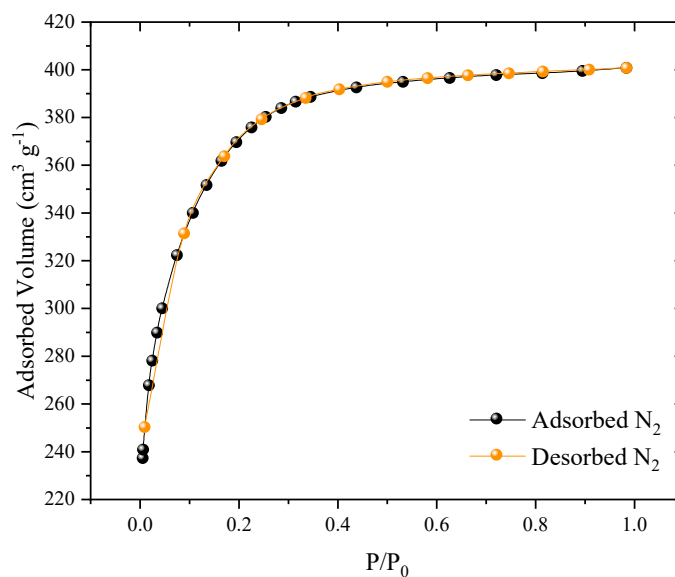

**Figure S1.** N<sub>2</sub> adsorption and desorption isotherms for the activated carbon.

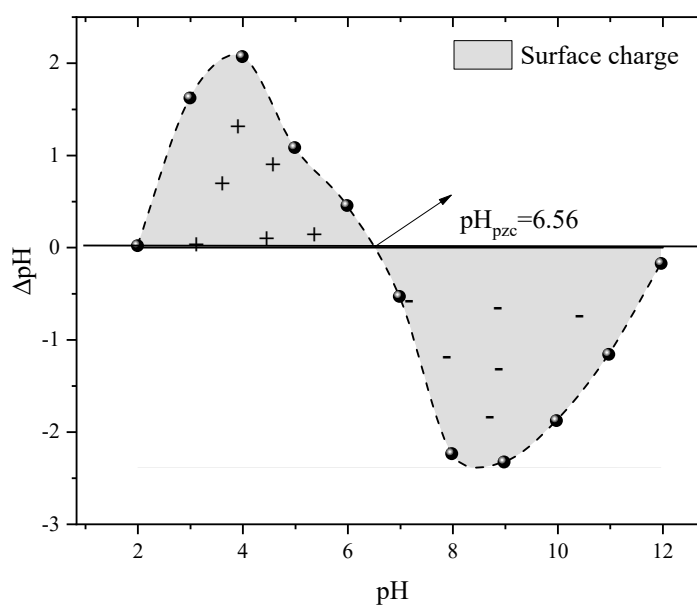

**Figure S2.** Variation of the solution pH as function of the initial solution pH and representation of pH<sub>pzc</sub> and surface charges

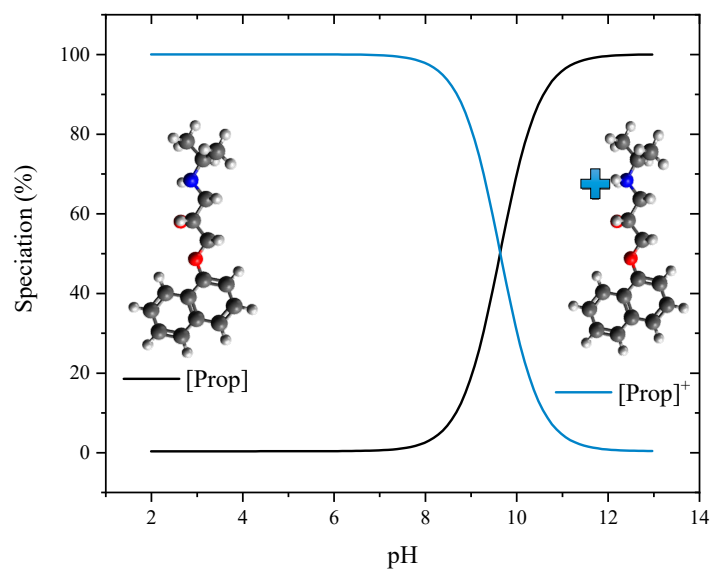

**Figure S3.** Speciation diagram for the propranolol, according to the pH, prediction obtained from the MarvinSketch software.

Disclaimer/Publisher's Note: The statements, opinions and data contained in all publications are solely those of the individual author(s) and contributor(s) and not of MDPI and/or the editor(s). MDPI and/or the editor(s) disclaim responsibility for any injury to people or property resulting from any ideas, methods, instructions or products referred to in the content.
